# Supplementary material for: A bacterial small RNA regulates the adaptation of Helicobacter pylori to the host environment
Source: PubMed Central journal article supplement (PMC8035401; doi:10.1038/s41467-021-22317-7), 2021-04-09
Supplement: 41467_2021_22317_MOESM1_ESM.pdf [file 41467_2021_22317_MOESM1_ESM.pdf]

## **Supplementary Information**

### **A bacterial small RNA regulates the adaptation of *Helicobacter pylori* to the host environment**

Ryo Kinoshita-Daitoku, Kotaro Kiga, Masatoshi Miyakoshi, Ryota Otsubo, Yoshitoshi Ogura, Takahito Sanada, Zhu Bo, Tuan Vo Phuoc, Tokuju Okano, Tamako Iida, Rui Yokomori, Eisuke Kuroda, Sayaka Hirukawa, Mototsugu Tanaka, Arpana Sood, Phawinee Subsomwong, Hiroshi Ashida, Tran Thanh Binh, Lam Tung Nguyen, Khien Vu Van, Dang Quy Dung Ho, Kenta Nakai, Toshihiko Suzuki, Yoshio Yamaoka, Tetsuya Hayashi, and Hitomi Mimuro

Correspondence and requests for materials should be addressed to Hitomi Mimuro (mimuro@biken.osaka-u.ac.jp)

#### **This PDF file includes:**

Supplementary Figures 1 to 7

#### **Other Supplementary Information files in this study include the following:**

Supplementary Data 1 to 8

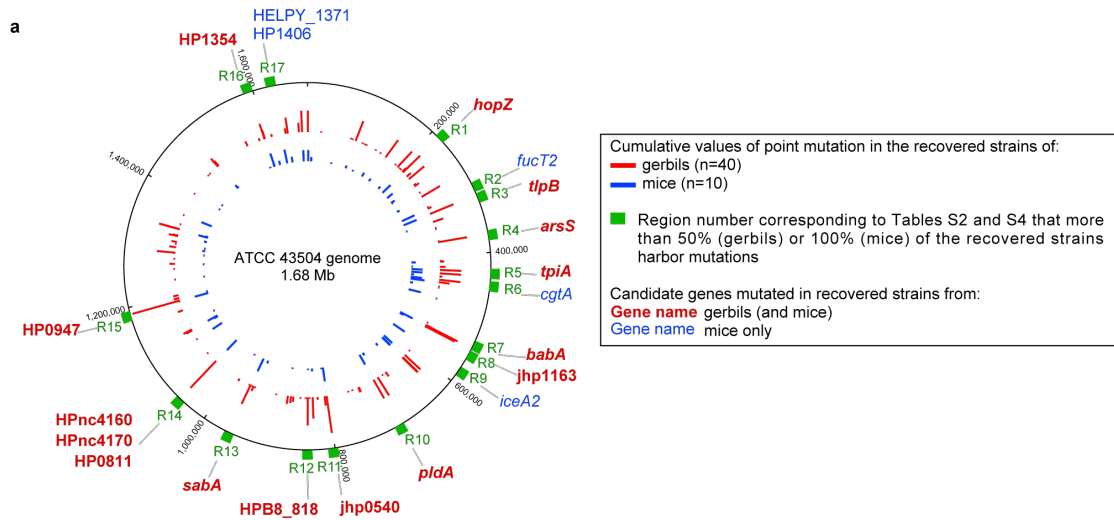

**b**

| Region No. | Gene symbol        | Gene description                               | Mongolian gerbils (8 wks post infection)            |                               | C57BL/6 mice (8 wks post infection)                 |                               |
|------------|--------------------|------------------------------------------------|-----------------------------------------------------|-------------------------------|-----------------------------------------------------|-------------------------------|
|            |                    |                                                | Fold change of mRNA expression level [mut(+)/input] | Mutation rate (% /40 strains) | Fold change of mRNA expression level [mut(+)/input] | Mutation rate (% /10 strains) |
| R1         | <i>hopZ</i>        | outer membrane protein                         | 0.373                                               | 52.5                          | N/A                                                 | N/A                           |
| R2         | <i>fucT2</i>       | alpha-1,2-fucosyltransferase                   | N/A                                                 | N/A                           | 0.758                                               | 100.0                         |
| R3         | <i>tlpB</i>        | methyl-accepting chemotaxis protein            | 1.239                                               | 50.0                          | 0.913                                               | 100.0                         |
| R4         | <i>arsS</i>        | histidine kinase sensor protein                | 3.572                                               | 62.5                          | N/A                                                 | N/A                           |
| R5         | <i>tpiA</i>        | triosephosphate isomerase                      | 1.286                                               | 80.0                          | 0.825                                               | 100.0                         |
| R6         | <i>cgtA</i>        | beta-1,4-N-acetylgalactosamyltransferase       | N/A                                                 | N/A                           | 1.453                                               | 100.0                         |
| R7         | <i>babA</i>        | outer membrane protein babA                    | 1.263                                               | 80.0                          | 1.243                                               | 100.0                         |
| R8         | <i>jhp1163</i>     | hypothetical protein                           | 1.374                                               | 80.0                          | N/A                                                 | N/A                           |
| R9         | <i>iceA2</i>       | Ulcer-associated gene restriction endonuclease | N/A                                                 | N/A                           | 1.104                                               | 100.0                         |
| R10        | <i>pldA</i>        | phospholipase A1                               | 2.420                                               | 60.0                          | N/A                                                 | N/A                           |
| R11        | <i>jhp0540</i>     | hypothetical protein                           | 1.946                                               | 70.0                          | 1.497                                               | 100.0                         |
| R12        | <i>HPB8_818</i>    | family 25 glycosyl transferase                 | 5.346                                               | 52.5                          | N/A                                                 | N/A                           |
| R13        | <i>sabA</i>        | outer membrane protein sabA                    | 5.215                                               | 62.5                          | 1.512                                               | 100.0                         |
| R14        | <i>HPnc4160</i>    | mRNA/antisense RNA family IsoB                 | 0.155                                               | 72.5                          | 0.297                                               | 100.0                         |
| R14        | <i>HPnc4170</i>    | mRNA/antisense RNA family aapB                 | 0.794                                               | 72.5                          | 1.043                                               | 100.0                         |
| R14        | <i>HP0811</i>      | hypothetical protein                           | 1.698                                               | 72.5                          | 1.075                                               | 100.0                         |
| R15        | <i>HP0947</i>      | hypothetical protein                           | 1.300                                               | 92.5                          | 0.511                                               | 100.0                         |
| R16        | <i>HP1354</i>      | adenine-specific DNA methyltransferase         | 1.512                                               | 57.5                          | 1.138                                               | 100.0                         |
| R17        | <i>HELPHY_1371</i> | Type III restriction enzyme R protein          | N/A                                                 | N/A                           | 1.018                                               | 100.0                         |
| R17        | <i>HP1406</i>      | biotin synthase                                | N/A                                                 | N/A                           | 1.200                                               | 100.0                         |

**c** Strains from C57BL/6 mice infected with ATCC 43504 WT

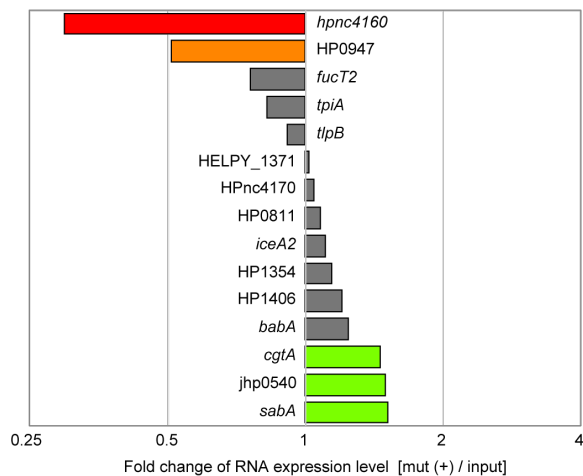

**Supplementary Fig. 1 Candidate RNA expression of strains recovered from *H. pylori* ATCC 43504-infected rodent stomachs.** **a**, Circular genomic map of ATCC 43504 strain recovered from stomachs of gerbils and mice. **b**, Mutation rates and expression levels of candidate RNAs (mRNA or non-coding RNA) of strains recovered from the stomachs of gerbils or mice 8 weeks post-infection. The locus tags (red) indicate candidates common in both strains originating from gerbils and mice. N/A, not applicable. **c**, Candidate RNA (mRNA or non-coding RNA) expression of isolates recovered from *H. pylori* ATCC 43504-infected C57BL/6 mice stomachs. RNA expression of the genes or nearby genes of genome regions (Supplementary Fig. 1a and Supplementary Data 4), which were mutated in 100% of the recovered strains were assessed. Source data are provided as a Source Data file.

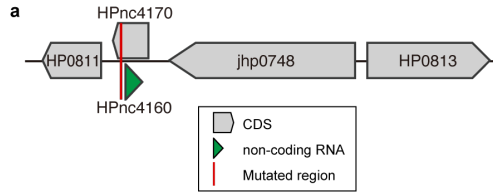

**b**

|                              |              |              |          |                                        |          |                    |               |    |    |
|------------------------------|--------------|--------------|----------|----------------------------------------|----------|--------------------|---------------|----|----|
|                              | -40          | -30          | -20      | -10                                    | 1        | 10                 | 20            | 30 | 40 |
| <i>H. pylori</i> ATCC 43504  | aaataacatcgt | tttttttttttt | -----    | ggtataatgctcgcggaaggaagcgaaaggcgattata | ----     | ttccttccttctt      |               |    |    |
| <i>H. pylori</i> PMSS1       | aaataacatc-  | tttttttttttt | -----    | ggtataatgc-cgcctaaggaagcgaaaggcgattata | ----     | ttccttccttctt      |               |    |    |
| <i>H. pylori</i> SS1         | aaataacatc-  | tttttttttttt | -----    | ggtataatgc-cgcctaaggaagcgaaaggcgattata | ----     | ttccttccttctt      |               |    |    |
| <i>H. pylori</i> 26695       | aaataacatcgt | tttttttttttt | -----    | ggtataatgctcgcggaaggaagcgaaaggcgattata | ----     | ttccttccttctt      |               |    |    |
| <i>H. pylori</i> J99         | aaataacatcgt | tttttttttttt | -----    | ggtataatgctcgcggaaggaagcgaaaggcgattata | ----     | ttccttccttctt      |               |    |    |
| <i>H. pylori</i> HPAG1       | aaataacatcgt | tttttttttttt | -----    | ggtataatgctcgcggaaggaagcgaaaggcgattata | ----     | ttccttccttctt      |               |    |    |
| <i>H. pylori</i> G27         | aaataacatc-  | tttttttttttt | -----    | ggtataatgc-cgcctaaggaagcgaaaggcgattata | ----     | ttccttccttctt      |               |    |    |
| <i>H. pylori</i> Shi470      | aaataacatcgt | tttttttttttt | -----    | ggtataatgctcgcggaaggaagcgaaaggcgattata | ----     | ttccttccttctt      |               |    |    |
| <i>H. acinonychis</i> Sheeba | aaataaca---  | tttttttttt   | agtataat | agtataatgt-tgttg--                     | ggaagggc | caaaggcg-aaaata--- | ttccttccttctt |    |    |

  

|                              |                     |                  |                   |                        |           |    |     |
|------------------------------|---------------------|------------------|-------------------|------------------------|-----------|----|-----|
|                              | 41                  | 50               | 60                | 70                     | 80        | 90 | 100 |
| <i>H. pylori</i> ATCC43504   | tactataac-ttagca-tt | tttaatcaacttttt  | -----             | cattaaaatgctcgtgacgctt | acett-aa  |    |     |
| <i>H. pylori</i> PMSS1       | tactataac-ttagca-tt | tttaatcaacttttt  | -----             | cattaaaatgctcgtgacgctt | acettttc  |    |     |
| <i>H. pylori</i> SS1         | tactataac-ttagca-tt | tttaatcaacttttt  | -----             | cattaaaatgctcgtgacgctt | acettttc  |    |     |
| <i>H. pylori</i> 26695       | tactataac-ttagca-tt | tttaatcaacttttt  | -----             | cattaaaatgctcgtgacgctt | acett-aa  |    |     |
| <i>H. pylori</i> J99         | tactataac-ttagca-tt | tttaatcaacttttt  | -----             | cattaaaatgctcgtgacgctt | acettaaaa |    |     |
| <i>H. pylori</i> HPAG1       | tactataac-ttagca-tt | tttaatcaacttttt  | -----             | cattaaaatgctcgtgacgctt | acett-aa  |    |     |
| <i>H. pylori</i> G27         | tactataac-ttagca-tt | tttaatcaacttttt  | -----             | cattaaaatgctcgtgacgctt | acett---  |    |     |
| <i>H. pylori</i> Shi470      | tactataac-ttagca-tt | tttaataaacttttt  | -----             | cattaaaatgctcgtgacgctt | acettcaa  |    |     |
| <i>H. acinonychis</i> Sheeba | tactataacattagcatt  | tttttagtaacttttt | ctttttacattaaaatg | ctcctgacgctt           | acett---  |    |     |

**c** ATCC 43504 WT

-40 -30 -20 -10 1 10 20 30 40 50

aaataacatcgtttttttttttttggtataatgctcgcggaaggaagcgaaaggcgattataatctccttccttcttactataactta...

T-repeat elongation pattern in the recovered strains from mice

|                      |                  |
|----------------------|------------------|
| No. of strains/total |                  |
| 1/10 (10%)           | GTTTTTTTTTTTTTTT |
| 5/10 (50%)           | GTTTTTTTTTTTTTTT |
| 4/40 (40%)           | GTTTTTTTTTTTTTTT |

Green : HPnc4160 transcribed sequence  
 Red frame : T-repeat region  
 Red Ts : inserted nucleotides

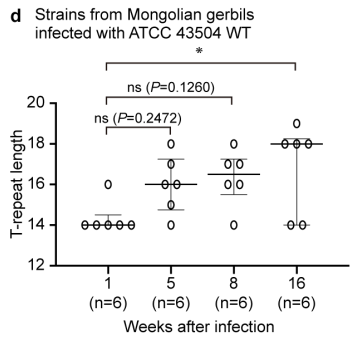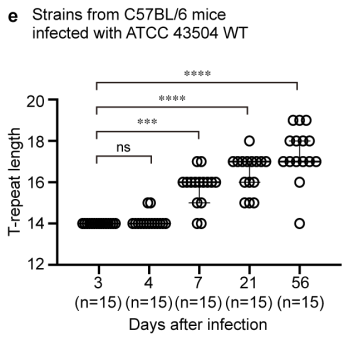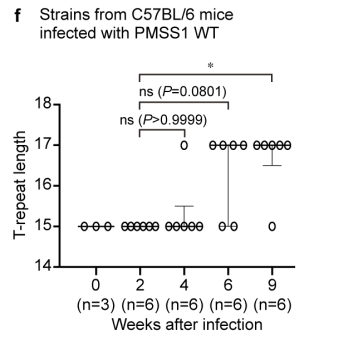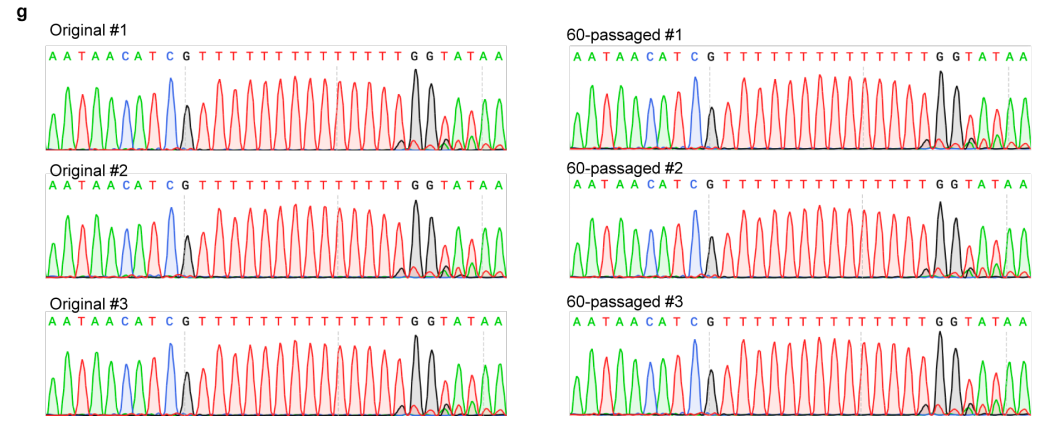

**Supplementary Fig. 2 Length of the T-repeat region upstream of the HPnc4160 coding region.** **a**, Schematic structures of genes around HPnc4160. **b**, Schematic of the DNA sequence around the HPnc4160 and T-repeat sequences of analyzed strains. Red = T-repeat sequences. **c**, Schematic of the DNA sequence around the HPnc4160 and T-repeat sequence of mice-recovered strains 8 wks after infection (n = 10). Green = HPnc4160 transcribed sequence, red frame = T-repeat region upstream of HPnc4160, and red- Ts = inserted nucleotides compared with wild-type. **d-f**, Time-dependent changes in the length of the T-repeat region upstream of the HPnc4160 coding region in gerbils or mice-recovered strains. Strains from Mongolian gerbils infected with ATCC 43504 (**d**). Strains from C57BL/6 mice infected with ATCC 43504 (**e**). Strains from C57BL/6 mice infected with PMSS1 (**f**). Data are presented as the median with interquartile range. *P* values were obtained from non-parametric Dunn's multiple comparison test (two-sided). \**P* = 0.0373 (**d**); \*\*\**P* = 0.0007, \*\*\*\**P* < 0.0001 (**e**); \**P* = 0.0130 (**f**); ns: not significant. **g**, Effect of *in vitro* cultivation on the length of the T-repeat region upstream of the HPnc4160 coding region. Raw data from the DNA sequence analysis of *H. pylori* genomes prepared from original culture (Original #1 - #3) and from those passaged *in vitro* 60 times (60-passaged #1 - #3). Source data are provided as a Source Data file.

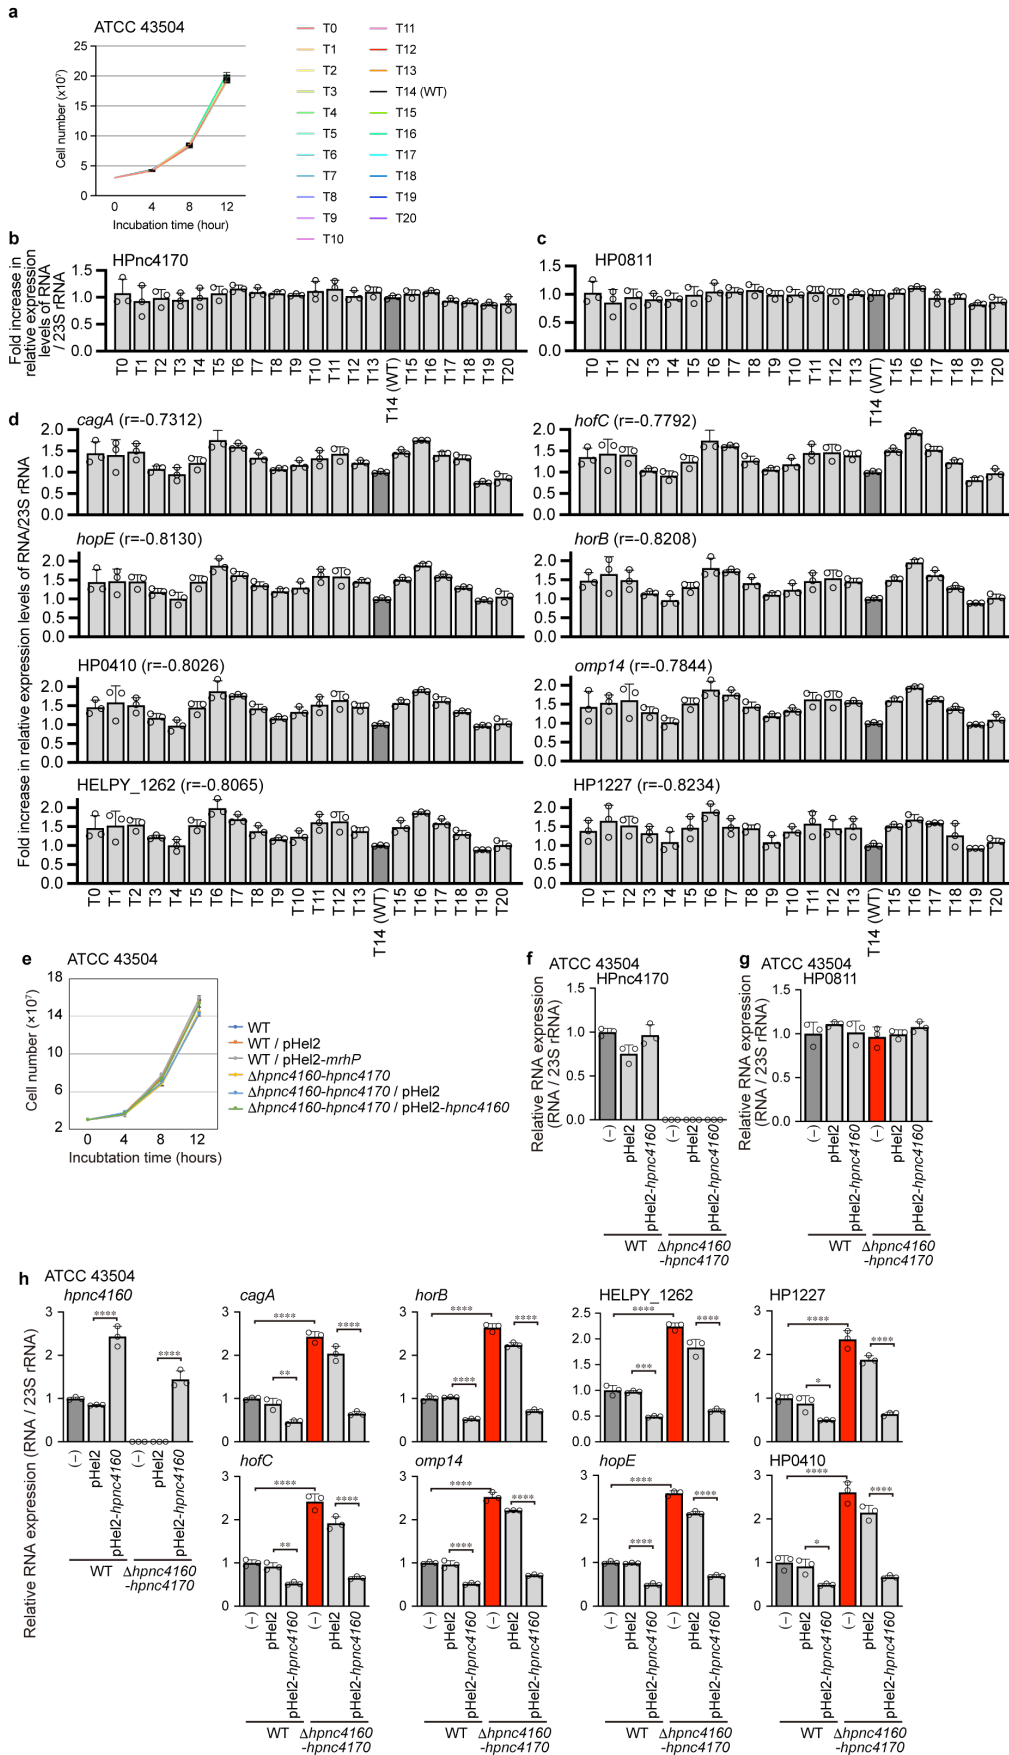

**Supplementary Fig. 3 Validation of target mRNA of HPnc4160, and the effect of HPnc4160, upstream T-repeat length on mRNA expression.** **a**, Growth curves of *H. pylori* ATCC 43504 mutants with respect to the number of T-repeats upstream of the HPnc4160 coding region. **b, c**, Relative expression of *hpnc4170* (**b**) and HP0811 (**c**) in the *H. pylori* strains genetically modified with respect to T-repeat length. Data are presented as means  $\pm$  s.d. ( $n = 3$ ). **d**, Total RNA from the indicated *H. pylori* ATCC 43504 strains was extracted, reverse transcribed and analyzed by qPCR to assess the indicated genes. Data are presented as the means  $\pm$  s.d. of three separate experiments. Spearman correlation coefficients ( $r$ ) were used to evaluate the relationship between the relative RNA expression of HPnc4160 (Fig. 1e) and that of each target. **e**, Growth curves of *H. pylori* ATCC 43504 mutants. **f-h**, Relative RNA expression of HPnc4170 (**f**), HP0811 (**g**), and target candidates for HPnc4160 (**h**). Data are presented as the means  $\pm$  s.d. of three experiments.  $**P = 0.0043$  (*cagA*),  $***P = 0.0001$  (HELPHY\_1262),  $*P = 0.0226$  (HP1227),  $**P = 0.0072$  (*hofC*),  $*P = 0.0483$  (HP0410);  $****P < 0.0001$ , by Tukey's multiple comparison test (two-sided). Data are representative of two independent experiments (**a-h**). Source data are provided as a Source Data file.

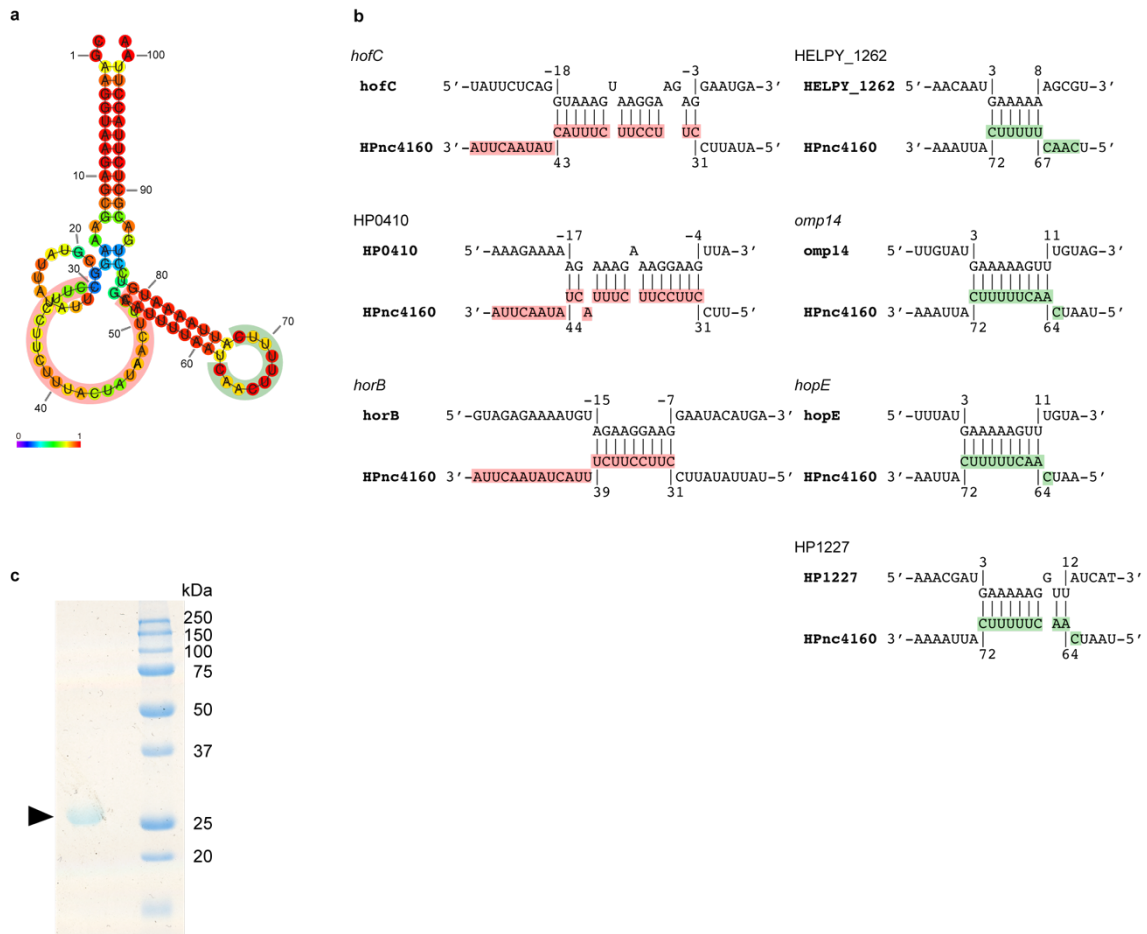

**Supplementary Fig. 4 Predicted HPnc4160 binding sites.** **a**, Predicted HPnc4160 binding sites. **a**, Secondary structure of HPnc4160 RNA as predicted by CentroidFold. The bases in the predicted structure are colored according to base-pairing probabilities. Circles in pink and light green indicate loop structures with probable binding to target RNA sequences. **b**, Schematic of predicted HPnc4160 binding sites in the corresponding 5'UTR sequence of target genes. Upper sequences indicate target mRNA sequences with base numbers, whereas lower sequences indicate the HPnc4160 sequence. Colored sequences correspond to the loop structures indicated in (a). **c**, Purified RNase III was separated by SDS-PAGE and stained with CBB. Data are representative of two independent experiments (c). Source data are provided as a Source Data file.



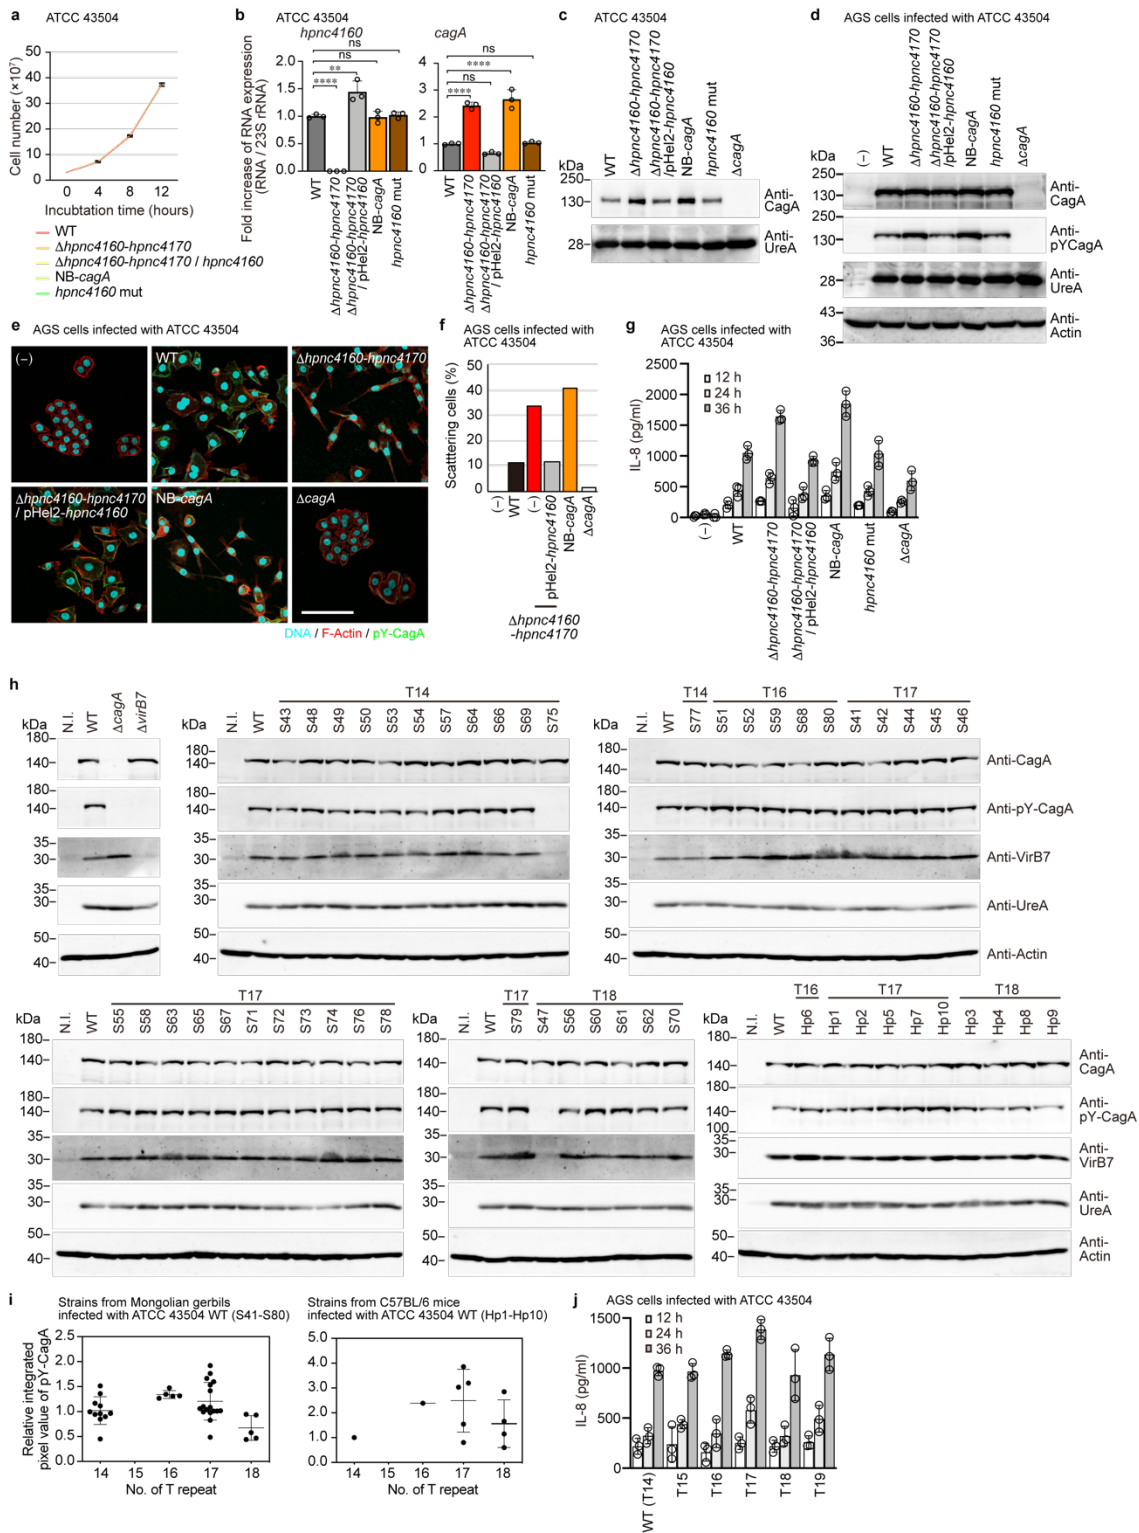

**Supplementary Fig. 5 Effect of NB-cagA on host-cell-translocated CagA activity. a,** Growth curves of *H. pylori* ATCC 43504 NB-cagA mutant compared with wild-type. **b,** Relative RNA expression of HPnc4160 and *cagA* in each mutant strain. Data are

presented as the means  $\pm$  s.d. of three experiments. **\*\*** $P = 0.0013$ , **\*\*\*\*** $P < 0.0001$  by non-parametric Dunnett's multiple comparison test (two-sided). ns: not significant. **c**, CagA levels in each mutant strain, UreA served as the bacterial loading control. **d**, Phosphorylated CagA protein levels in cell lysates of AGS cells infected with *H. pylori* ATCC 43504. Whole-cell lysates of AGS cells infected with *H. pylori* strains for 6 h were subjected to western blot against anti-CagA, anti-pY CagA, anti-UreA, and anti-actin antibodies. Actin served as the cellular loading control. **e–f**, Scattering phenotypes of *H. pylori* ATCC 43504-infected AGS gastric epithelial cells. **e**, DNA (blue), F-actin (red), and anti-phosphorylated CagA antibody (pY-CagA, green). Scale bar, 50  $\mu$ m. **f**, Quantification of scattering activity of AGS cells induced by *H. pylori* infection. **g–j**, Supernatants from AGS cells infected with *H. pylori* strains for the indicated time were subjected to ELISA for IL-8. Data are presented as the means  $\pm$  s.d. of three independent experiments. **h–i**, Phosphorylated CagA protein and VirB7 levels in cell lysates of AGS cells infected with *H. pylori* isolates from rodents. Whole-cell lysates of AGS cells infected with *H. pylori* strains (S41–S80, strains from Mongolian gerbils infected with ATCC 43504 WT; Hp1–Hp10, strains from C57BL/6 mice infected with ATCC 43504 WT; Supplementary Data 1 and 3) for 6 h were subjected to western blot against anti-CagA, anti-pY CagA, anti-UreA, anti-actin, and anti-VirB7 antibodies. The band intensities (excluding S47 and S75 lacking VirB7) were measured and calculated by ImageJ software (**i**). Data are representative of two independent experiments (**a–j**). Source data are provided as a Source Data file.

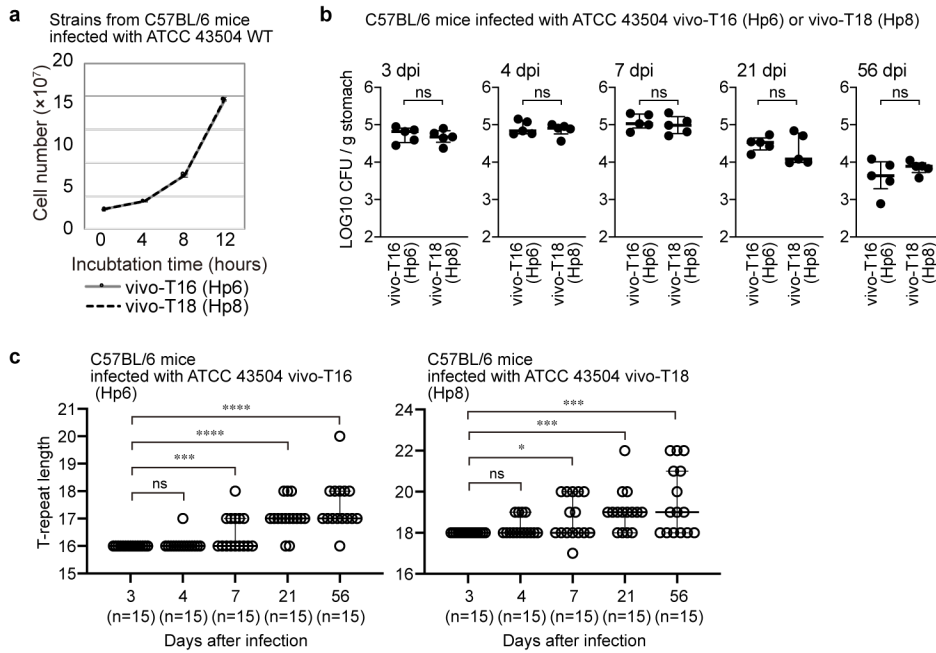

**Supplementary Fig. 6 Time-dependent changes in bacterial-host adaptation and the T-repeat length of isolates from mice.** **a**, Growth curves of mouse-derived strains Hp6 and Hp8 recovered from mouse at 8 wks post infection (Hp6, possessing T16 repeat; Hp8, possessing T18 repeat; Supplementary Data 4 and 5). Data are representative of two independent experiments. **b–c**, Reinfection of isolates from mouse stomach (Hp6, possessing T16 repeat; Hp8, possessing T18 repeat). Bacterial number in mouse stomach (**b**) and the length of the T-repeat region upstream of the HPnc4160 coding region (**c**) in isolates from mouse stomach infected with Hp6 or Hp8 were measured. Statistical significance determined by two-tailed Mann-Whitney test (**b**), or uncollected two-tailed Dunn's multiple comparison test (**c**). \*\*\* $P = 0.00479$ , \*\*\*\* $P < 0.0001$  (Hp6); \* $P = 0.0189$ , \*\*\* $P = 0.0004$  (middle and upper), (Hp8); ns, not significant. Source data are provided as a Source Data file.

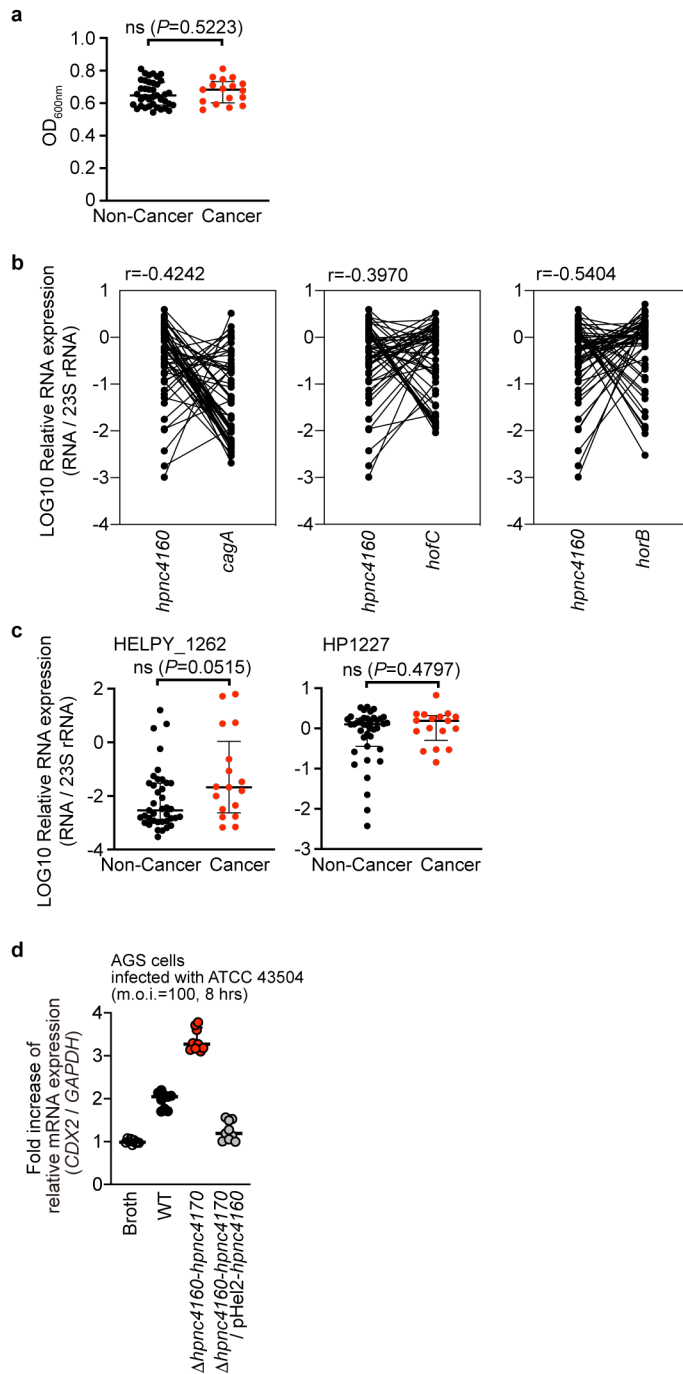

**Supplementary Fig. 7 Characterization of clinical isolates and effect of HPnc4160 on expression of CDX2, a marker for the intestinal-type gastric epithelial neoplasia.**

**a**, Growth rates of clinical isolates of non-cancer patients (non-cancer,  $n = 39$ ) and patients with cancer (cancer,  $n = 17$ ), as used in Fig. 4d. Data are presented as the medians with interquartile range.  $P$  values represent the results of a two-tailed Mann-Whitney test. ns: not significant. **b**, Relative RNA expression of candidate HPnc4160 targets. Spearman

correlation coefficients ( $r$ ) were used to evaluate the relationships between the relative RNA expression of HPnc4160 and that of each target. **c**, Comparison of mRNA (HELPHY\_1262 and HP1227) expression in clinical isolates of non-cancer patients (non-cancer,  $n = 39$ ) and patients with cancer (cancer,  $n = 17$ ). mRNA expression was normalized to that of 23S rRNA. **d**, Expression levels of *CDX2* in AGS cells infected with indicated *H. pylori* at 8 hours post infection at multiplicity of infection (m.o.i.) of 100. Data are presented as the medians with interquartile range. *P* values represent the results of a two-tailed Mann-Whitney test. Source data are provided as a Source Data file.
